# Supplementary material for: Low temperature red luminescence of a fluorinated Mn-doped zinc selenite
Source: Royal Society of Chemistry journal article supplement (doi:10.1039/c3dt51224j), 2013-01-01
Supplement: c3dt51224j.pdf [file c3dt51224j.pdf]

## Supporting Information

# Low temperature red luminescence of a fluorinated Mn-doped zinc selenite

*Joseba Orive*<sup>a</sup>, *Rolindes Balda*<sup>b,c</sup>, *Joaquín Fernández*<sup>b,c</sup>, *Luis Lezama*<sup>d</sup>  
and *María I. Arriortua*<sup>a,\*</sup>

<sup>a</sup> Departamento de Mineralogía y Petrología, Facultad de Ciencia y Tecnología,  
Universidad del País Vasco (UPV/EHU), Apdo.644, 48080 Bilbao, Spain.

<sup>b</sup> Departamento Física Aplicada I, Escuela Técnica Superior de Ingeniería, Alda.  
Urquijo s/n 48013 Bilbao, Spain.

<sup>c</sup> Centro de Física de Materiales CSIC-UPV/EHU and Donostia International Physics  
Center, Apdo. 1072, 20080 San Sebastián, Spain.

<sup>d</sup> Departamento de Química Inorgánica, Facultad de Ciencia y Tecnología, Universidad  
del País Vasco (UPV/EHU), Apdo.644, 48080 Bilbao, Spain.

\* Corresponding author: [maribel.arriortua@ehu.es](mailto:maribel.arriortua@ehu.es)

Phone: 34-946012162. Fax: 34-946013500

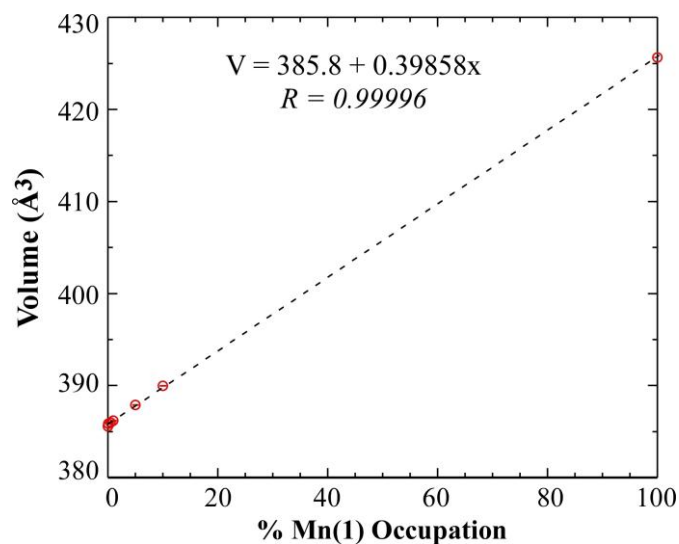

**Figure S1.** Variation of the volume as a function of the occupation factor of the manganese atoms for  $M_2(\text{SeO}_3)\text{F}_2$  ( $M = \text{Zn}$  (1),  $\text{Mn}$  (2)) system.

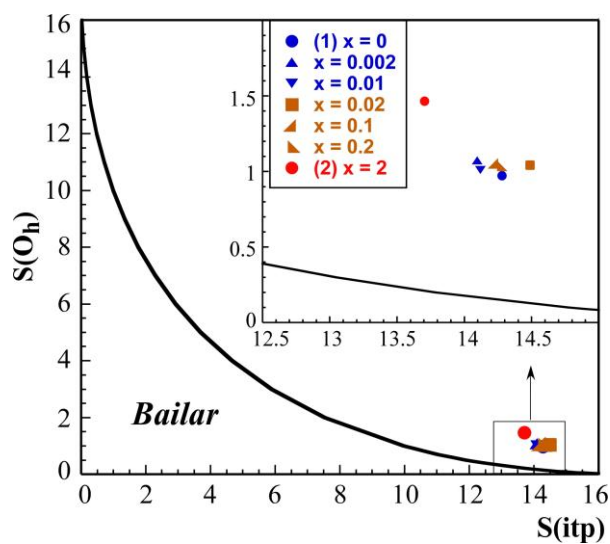

**Figure S2.** Distortion values of the  $[(\text{Mn},\text{Zn})\text{O}_3\text{F}_3]$  octahedra belonging to  $\text{Zn}_2(\text{SeO}_3)\text{F}_2$  (1),  $\text{Mn}_2(\text{SeO}_3)\text{F}_2$  (2) and to the Mn-doped compounds.

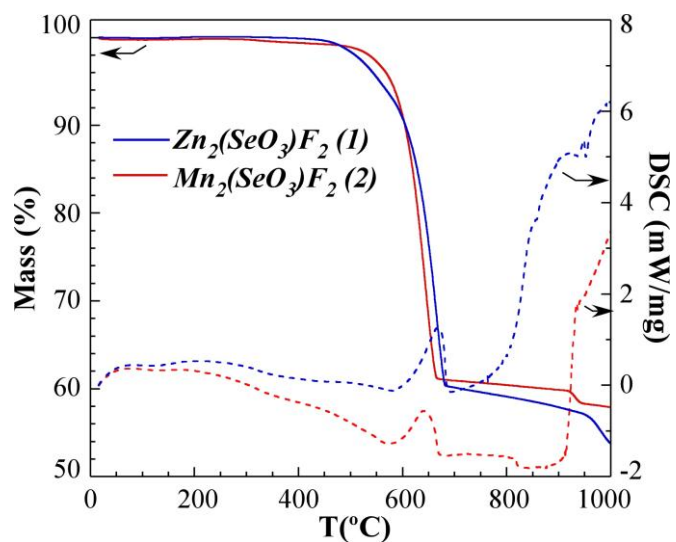

**Figure S3.** Thermal analysis (TGA, DSC) of  $\text{Zn}_2(\text{SeO}_3)\text{F}_2$  (1) and  $\text{Mn}_2(\text{SeO}_3)\text{F}_2$  (2).

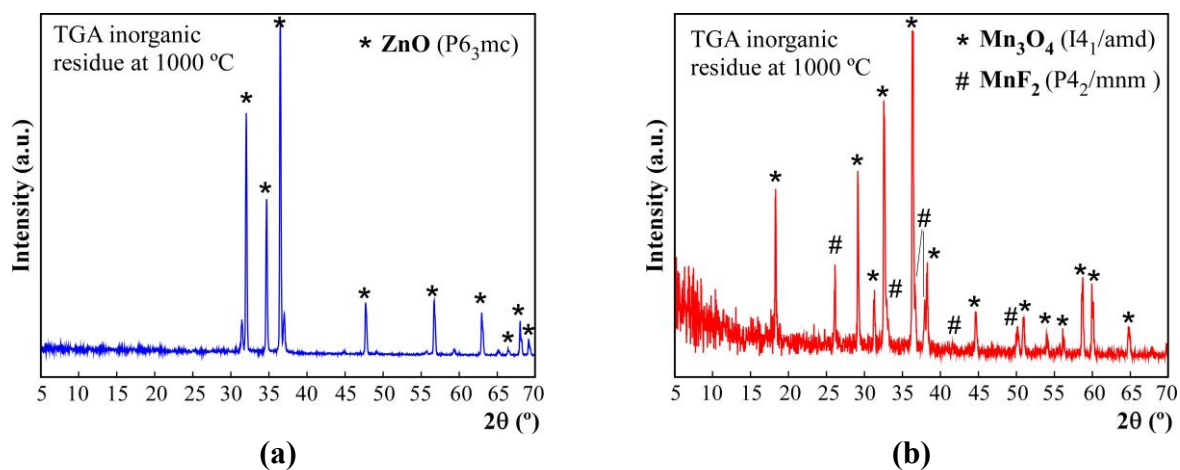

**Figure S4.** X-ray powder diffraction patterns of the TGA inorganic residues obtained at 1000 °C for (a)  $\text{Zn}_2(\text{SeO}_3)\text{F}_2$  (1) and (b)  $\text{Mn}_2(\text{SeO}_3)\text{F}_2$  (2).

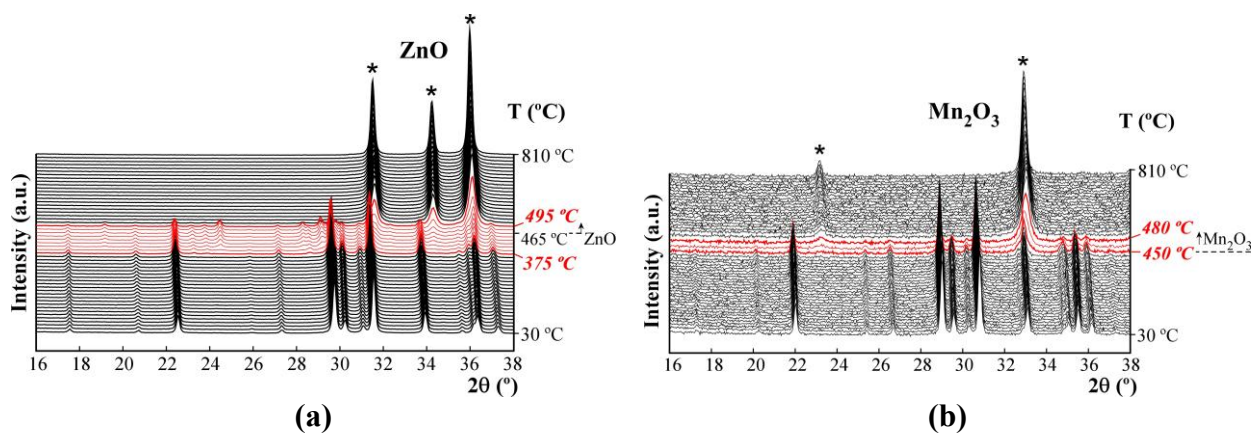

**Figure S5.** Thermodiffractograms of (a)  $\text{Zn}_2(\text{SeO}_3)\text{F}_2$  (1) and (b)  $\text{Mn}_2(\text{SeO}_3)\text{F}_2$  (2).

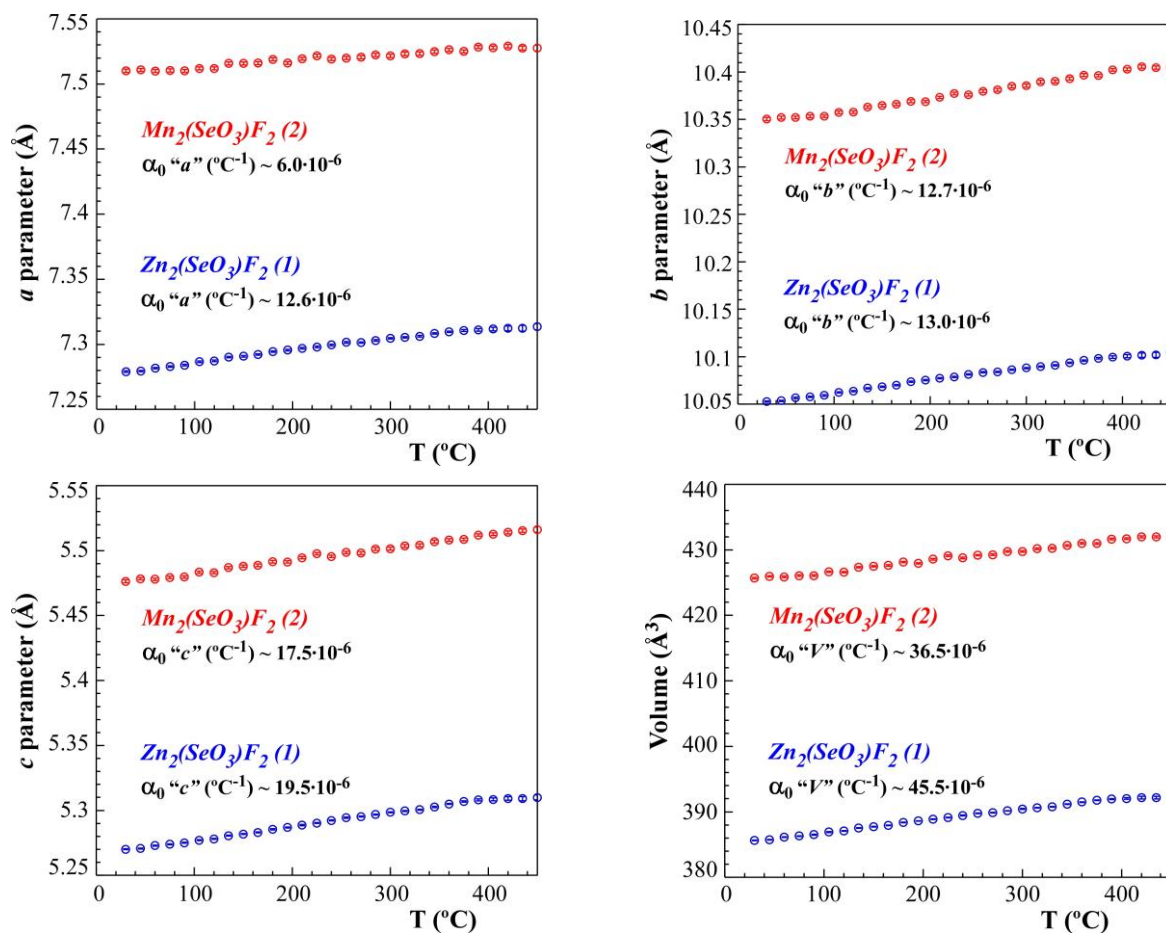

**Figure S6.** Thermal evolution of the parameters and volume of the unit cells for  $Zn_2(SeO_3)F_2$  (1) and (b)  $Mn_2(SeO_3)F_2$  (2) in the 30 to 450 °C temperature range.

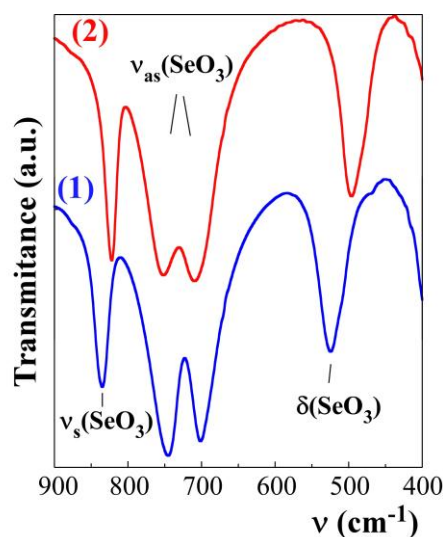

**Figure S7.** Infrared spectra of the compounds  $Zn_2(SeO_3)F_2$  (1) and  $Mn_2(SeO_3)F_2$  (2) in the 400 to 900  $cm^{-1}$  frequency range.

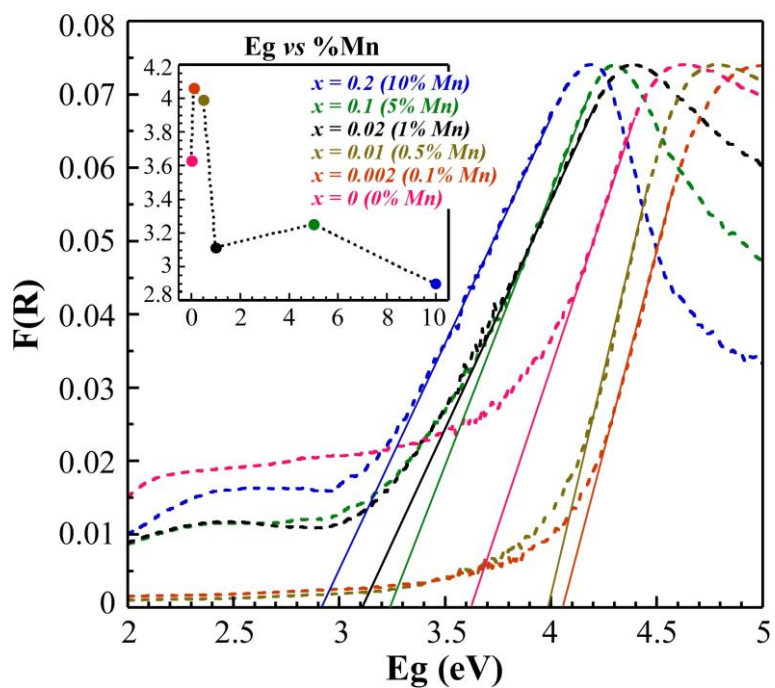

**Figure S8.** Diffuse reflectance spectra for  $Zn_{2-x}Mn_x(SeO_3)F_2$  ( $x = 0, 0.002, 0.01, 0.02, 0.1$  and  $0.2$ ) compounds. Inset shows the variation in band gap with Mn concentration.

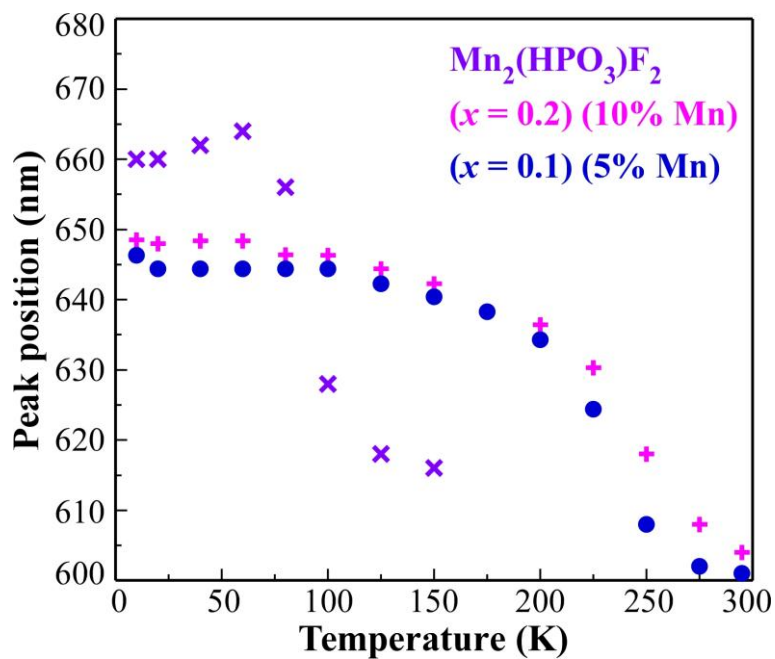

**Figure S9.** Peak position of the emission band as a function of temperature.

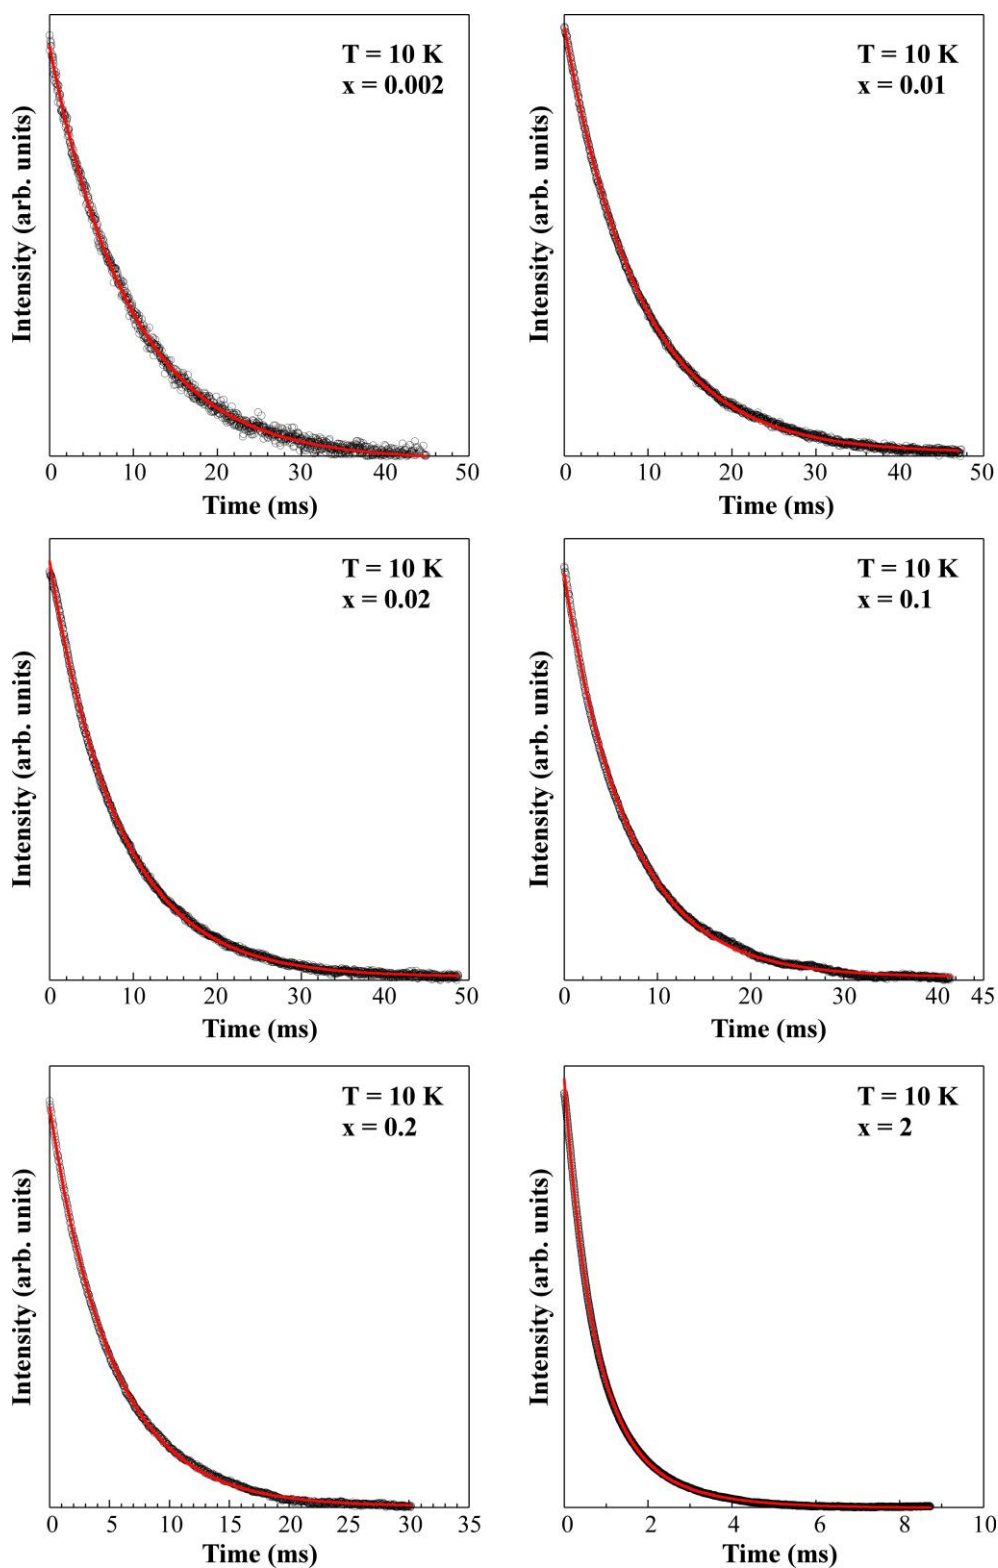

**Figure S10.** Experimental emission decay curves of the  ${}^4T_1$  state for the samples  $Zn_{2-x}Mn_x(SeO_3)F_2$  ( $x = 0.002, 0.01, 0.02, 0.1, 0.2,$  and  $2$ ) (symbols). The solid lines are the fits to an exponential function.

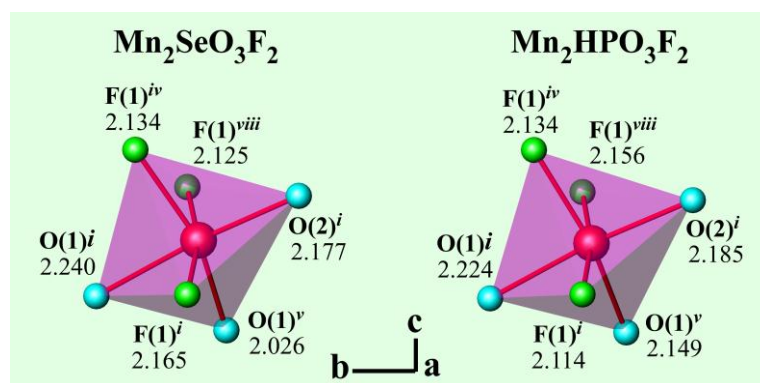

| Atom                       | Mn <sub>2</sub> SeO <sub>3</sub> F <sub>2</sub> | Mn <sub>2</sub> HPO <sub>3</sub> F <sub>2</sub> |
|----------------------------|-------------------------------------------------|-------------------------------------------------|
| <b>O(1)<sup>v</sup></b>    | <b>2.026</b>                                    | <b>2.149</b>                                    |
| <b>F(1)<sup>viii</sup></b> | 2.125                                           | 2.156                                           |
| <b>F(1)<sup>iv</sup></b>   | 2.134                                           | 2.134                                           |
| <b>F(1)<sup>i</sup></b>    | 2.165                                           | 2.114                                           |
| <b>O(2)<sup>i</sup></b>    | 2.177                                           | 2.185                                           |
| <b>O(1)<sup>i</sup></b>    | 2.240                                           | 2.224                                           |
| <b>Δ (Mn-O,F)</b>          | 2.026-2.240<br><b>(9.55%)</b>                   | 2.114-2.224<br><b>(4.95%)</b>                   |

**Figure S11.** Ligand environment of manganese ion in Mn<sub>2</sub>(SeO<sub>3</sub>)F<sub>2</sub> (**2**) and Mn<sub>2</sub>(HPO<sub>3</sub>)F<sub>2</sub>.

***Zn<sub>2</sub>(SeO<sub>3</sub>)F<sub>2</sub> (1) – Rietveld Refinement***

**Table S1.** Atomic coordinates and equivalent isotropic displacement parameters,  $B_{iso}$  ( $\text{\AA}^2$ ), for **(1)**.

| <i>Atoms</i> | <i>Wyckoff</i>  | <i>X</i>    | <i>Y</i>    | <i>Z</i>   | <i>B<sub>iso</sub></i> ( $\text{\AA}^2$ ) | <i>F. Oc.</i> |
|--------------|-----------------|-------------|-------------|------------|-------------------------------------------|---------------|
| <b>Zn(1)</b> | <i>8d (1)</i>   | 0.09266(14) | 0.43247(10) | 0.2497(2)  | 1.85(2)                                   | 1.0           |
| <b>Se(1)</b> | <i>4c (.m.)</i> | 0.18035(18) | 0.75000     | 0.1510(2)  | 1.89(3)                                   | 0.5           |
| <b>F(1)</b>  | <i>8d (1)</i>   | 0.3404(5)   | 0.4546(4)   | 0.0707(7)  | 1.95(10)                                  | 1.0           |
| <b>O(1)</b>  | <i>8d (1)</i>   | 0.0390(6)   | 0.6213(4)   | 0.0771(9)  | 1.85(12)                                  | 1.0           |
| <b>O(2)</b>  | <i>4c (.m.)</i> | 0.1661(9)   | 0.25000     | 0.3956(12) | 1.87(16)                                  | 0.5           |

**Table S2.** Bond distances ( $\text{\AA}$ ) and angles ( $^\circ$ ) for **(1)**.

| <b>[Zn(1)O<sub>3</sub>F<sub>3</sub>]</b> |                         |                         |                         |                            |                          |                         |
|------------------------------------------|-------------------------|-------------------------|-------------------------|----------------------------|--------------------------|-------------------------|
| <b>Zn(1)</b>                             | <b>O(1)<sup>v</sup></b> | <b>F(1)<sup>i</sup></b> | <b>O(2)<sup>i</sup></b> | <b>F(1)<sup>viii</sup></b> | <b>F(1)<sup>iv</sup></b> | <b>O(1)<sup>i</sup></b> |
| <b>O(1)<sup>i</sup></b>                  | 77.9(3)                 | 82.5(3)                 | 174.7(3)                | 86.4(3)                    | 84.5(3)                  | <b>2.141(4)</b>         |
| <b>F(1)<sup>iv</sup></b>                 | 158.9(4)                | 96.2(3)                 | 96.9(2)                 | 77.3(2)                    | <b>2.095(4)</b>          |                         |
| <b>F(1)<sup>viii</sup></b>               | 89.9(3)                 | 167.6(3)                | 98.9(3)                 | <b>2.078(4)</b>            |                          |                         |
| <b>O(2)<sup>i</sup></b>                  | 101.6(4)                | 92.3(3)                 | <b>2.059(3)</b>         |                            |                          |                         |
| <b>F(1)<sup>i</sup></b>                  | 93.1(3)                 | <b>2.047(4)</b>         |                         |                            |                          |                         |
| <b>O(1)<sup>v</sup></b>                  | <b>2.044(5)</b>         |                         |                         |                            |                          |                         |

| <b>[Se(1)O<sub>3</sub>]</b> |                         |                           |                          |
|-----------------------------|-------------------------|---------------------------|--------------------------|
| <b>Se(1)</b>                | <b>O(1)<sup>i</sup></b> | <b>O(1)<sup>vii</sup></b> | <b>O(2)<sup>iv</sup></b> |
| <b>O(2)<sup>iv</sup></b>    | 102.2(5)                | 102.2(5)                  | <b>1.749(7)</b>          |
| <b>O(1)<sup>vii</sup></b>   | 99.2(4)                 | <b>1.698(4)</b>           |                          |
| <b>O(1)<sup>i</sup></b>     | <b>1.698(4)</b>         |                           |                          |

Symmetry codes: *i* = *x*, *y*, *z*; *ii* = *x*+1/2, -*y*+1/2, -*z*+1/2; *iii* = -*x*, *y*+1/2, -*z*; *iv* = -*x*+1/2, -*y*, *z*+1/2;  
*v* = -*x*, -*y*, -*z*; *vi* = -*x*+1/2, *y*+1/2, *z*+1/2; *vii* = *x*, -*y*+1/2, *z*; *viii* = *x*+1/2, *y*, -*z*+1/2.



***Zn<sub>1.998</sub>Mn<sub>0.002</sub>(SeO<sub>3</sub>)F<sub>2</sub> (x = 0.002) – Rietveld Refinement***

**Table S3.** Atomic coordinates and equivalent isotropic displacement parameters,  $B_{iso}$  ( $\text{\AA}^2$ ), for  $x = 0.002$ .

| Atoms | Wyckoff  | X           | Y           | Z          | $B_{iso}$ ( $\text{\AA}^2$ ) | F. Oc.  |
|-------|----------|-------------|-------------|------------|------------------------------|---------|
| Zn(1) | 8d (1)   | 0.09244(16) | 0.43234(12) | 0.2496(3)  | 1.70(4)                      | 0.99900 |
| Mn(1) | 8d (1)   | 0.09244(16) | 0.43234(12) | 0.2496(3)  | 1.70(4)                      | 0.00100 |
| Se(1) | 4c (.m.) | 0.1800(2)   | 0.75000     | 0.1507(3)  | 1.75(4)                      | 0.50000 |
| F(1)  | 8d (1)   | 0.3406(6)   | 0.4548(4)   | 0.0670(8)  | 1.99(12)                     | 1.00000 |
| O(1)  | 8d (1)   | 0.0425(7)   | 0.6208(5)   | 0.0778(11) | 1.63(14)                     | 1.00000 |
| O(2)  | 4c (.m.) | 0.1692(11)  | 0.25000     | 0.3938(14) | 1.87(19)                     | 0.50000 |

**Table S4.** Bond distances ( $\text{\AA}$ ) and angles ( $^\circ$ ) for  $x = 0.002$ .

| [(Zn,Mn)(1)O <sub>3</sub> F <sub>3</sub> ] |                   |                     |                    |                    |                      |                   |
|--------------------------------------------|-------------------|---------------------|--------------------|--------------------|----------------------|-------------------|
| Zn(1)/Mn(1)                                | O(1) <sup>v</sup> | F(1) <sup>i</sup>   | O(2) <sup>i</sup>  | F(1) <sup>iv</sup> | F(1) <sup>viii</sup> | O(1) <sup>i</sup> |
| O(1) <sup>i</sup>                          | 78.0(3)           | 81.6(3)             | 173.4(4)           | 84.1(3)            | 87.2(3)              | <b>2.131(5)</b>   |
| F(1) <sup>iv</sup>                         | 89.8(3)           | 167.5(4)            | 99.4(4)            | 76.9(3)            | <b>2.085(5)</b>      |                   |
| F(1) <sup>viii</sup>                       | 158.3(4)          | 96.3(3)             | 97.2(2)            | <b>2.080(4)</b>    |                      |                   |
| O(2) <sup>i</sup>                          | 102.0(4)          | 91.8(3)             | <b>2.062(4)</b>    |                    |                      |                   |
| O(1) <sup>v</sup>                          | 93.2(3)           | <b>2.060(5)</b>     |                    |                    |                      |                   |
| F(1) <sup>i</sup>                          | <b>2.056(6)</b>   |                     |                    |                    |                      |                   |
| [Se(1)O <sub>3</sub> ]                     |                   |                     |                    |                    |                      |                   |
| Se(1)                                      | O(1) <sup>i</sup> | O(1) <sup>vii</sup> | O(2) <sup>iv</sup> |                    |                      |                   |
| O(1) <sup>i</sup>                          | 101.4(5)          | 101.4(5)            | <b>1.743(8)</b>    |                    |                      |                   |
| O(1) <sup>vii</sup>                        | 100.9(4)          | <b>1.684(5)</b>     |                    |                    |                      |                   |
| O(2) <sup>iv</sup>                         | <b>1.684(5)</b>   |                     |                    |                    |                      |                   |

Symmetry codes:  $i = x, y, z$ ;  $ii = x+1/2, -y+1/2, -z+1/2$ ;  $iii = -x, y+1/2, -z$ ;  $iv = -x+1/2, -y, z+1/2$ ;  
 $v = -x, -y, -z$ ;  $vi = -x+1/2, y+1/2, z+1/2$ ;  $vii = x, -y+1/2, z$ ;  $viii = x+1/2, y, -z+1/2$ .

***Zn<sub>1.99</sub>Mn<sub>0.01</sub>(SeO<sub>3</sub>)F<sub>2</sub> (x = 0.01) – Rietveld Refinement***

**Table S5.** Atomic coordinates and equivalent isotropic displacement parameters,  $B_{iso}$  ( $\text{\AA}^2$ ), for  $x = 0.01$ .

| <i>Atoms</i> | <i>Wyckoff</i>  | <i>X</i>    | <i>Y</i>    | <i>Z</i>   | <i>B<sub>iso</sub></i> ( $\text{\AA}^2$ ) | <i>F. Oc.</i> |
|--------------|-----------------|-------------|-------------|------------|-------------------------------------------|---------------|
| <b>Zn(1)</b> | <i>8d (1)</i>   | 0.09289(17) | 0.43278(12) | 0.2493(3)  | 1.91(4)                                   | 0.99500       |
| <b>Mn(1)</b> | <i>8d (1)</i>   | 0.09289(17) | 0.43278(12) | 0.2493(3)  | 1.91(4)                                   | 0.00500       |
| <b>Se(1)</b> | <i>4c (.m.)</i> | 0.1803(2)   | 0.75000     | 0.1514(3)  | 1.95(4)                                   | 0.50000       |
| <b>F(1)</b>  | <i>8d (1)</i>   | 0.3408(6)   | 0.4542(4)   | 0.0735(8)  | 1.92(11)                                  | 1.00000       |
| <b>O(1)</b>  | <i>8d (1)</i>   | 0.0399(7)   | 0.6203(5)   | 0.0763(11) | 1.76(14)                                  | 1.00000       |
| <b>O(2)</b>  | <i>4c (.m.)</i> | 0.1664(11)  | 0.25000     | 0.3970(15) | 2.57(20)                                  | 0.50000       |

**Table S6.** Bond distances ( $\text{\AA}$ ) and angles ( $^\circ$ ) for  $x = 0.01$ .

| <b>[(Zn,Mn)(1)O<sub>3</sub>F<sub>3</sub>]</b> |                         |                         |                         |                            |                          |                         |
|-----------------------------------------------|-------------------------|-------------------------|-------------------------|----------------------------|--------------------------|-------------------------|
| <b>Zn(1)/Mn(1)</b>                            | <b>F(1)<sup>i</sup></b> | <b>O(1)<sup>v</sup></b> | <b>O(2)<sup>i</sup></b> | <b>F(1)<sup>viii</sup></b> | <b>F(1)<sup>iv</sup></b> | <b>O(1)<sup>i</sup></b> |
| <b>O(1)<sup>i</sup></b>                       | 82.7(3)                 | 77.6(3)                 | 174.6(4)                | 86.6(3)                    | 84.9(3)                  | <b>2.130(5)</b>         |
| <b>F(1)<sup>iv</sup></b>                      | 96.2(3)                 | 158.6(4)                | 96.6(3)                 | 77.4(3)                    | <b>2.108(4)</b>          |                         |
| <b>F(1)<sup>viii</sup></b>                    | 168.0(4)                | 89.2(3)                 | 98.8(4)                 | <b>2.071(5)</b>            |                          |                         |
| <b>O(2)<sup>i</sup></b>                       | 92.1(3)                 | 101.9(4)                | <b>2.067(4)</b>         |                            |                          |                         |
| <b>O(1)<sup>v</sup></b>                       | 93.7(3)                 | <b>2.041(6)</b>         |                         |                            |                          |                         |
| <b>F(1)<sup>i</sup></b>                       | <b>2.040(5)</b>         |                         |                         |                            |                          |                         |

| <b>[Se(1)O<sub>3</sub>]</b> |                         |                           |                          |
|-----------------------------|-------------------------|---------------------------|--------------------------|
| <b>Se(1)</b>                | <b>O(1)<sup>i</sup></b> | <b>O(1)<sup>vii</sup></b> | <b>O(2)<sup>iv</sup></b> |
| <b>O(1)<sup>i</sup></b>     | 101.8(5)                | 101.8(5)                  | <b>1.745(8)</b>          |
| <b>O(1)<sup>vii</sup></b>   | 99.9(4)                 | <b>1.704(5)</b>           |                          |
| <b>O(2)<sup>iv</sup></b>    | <b>1.704(5)</b>         |                           |                          |

Symmetry codes: *i* = x, y, z; *ii* = x+1/2, -y+1/2, -z+1/2; *iii* = -x, y+1/2, -z; *iv* = -x+1/2, -y, z+1/2;  
*v* = -x, -y, -z; *vi* = -x+1/2, y+1/2, z+1/2; *vii* = x, -y+1/2, z; *viii* = x+1/2, y, -z+1/2.

***Zn<sub>1.98</sub>Mn<sub>0.02</sub>(SeO<sub>3</sub>)F<sub>2</sub> (x = 0.02) – Rietveld Refinement***

**Table S7.** Atomic coordinates and equivalent isotropic displacement parameters,  $B_{\text{iso}}$  ( $\text{\AA}^2$ ), for  $x = 0.02$ .

| <i>Atoms</i> | <i>Wyckoff</i>  | <i>X</i>    | <i>Y</i>    | <i>Z</i>   | <i>B<sub>iso</sub></i> ( $\text{\AA}^2$ ) | <i>F. Oc.</i> |
|--------------|-----------------|-------------|-------------|------------|-------------------------------------------|---------------|
| <b>Zn(1)</b> | <i>8d (1)</i>   | 0.09287(17) | 0.43258(13) | 0.2501(3)  | 1.47(3)                                   | 0.99000       |
| <b>Mn(1)</b> | <i>8d (1)</i>   | 0.09287(17) | 0.43258(13) | 0.2501(3)  | 1.47(3)                                   | 0.01000       |
| <b>Se(1)</b> | <i>4c (.m.)</i> | 0.1803(2)   | 0.75000     | 0.1510(3)  | 1.67(4)                                   | 0.50000       |
| <b>F(1)</b>  | <i>8d (1)</i>   | 0.3413(6)   | 0.4557(4)   | 0.0709(8)  | 1.55(11)                                  | 1.00000       |
| <b>O(1)</b>  | <i>8d (1)</i>   | 0.0375(7)   | 0.6201(5)   | 0.0782(11) | 1.25(14)                                  | 1.00000       |
| <b>O(2)</b>  | <i>4c (.m.)</i> | 0.1698(12)  | 0.25000     | 0.3965(15) | 2.3(2)                                    | 0.50000       |

**Table S8.** Bond distances ( $\text{\AA}$ ) and angles ( $^\circ$ ) for  $x = 0.02$ .

| <b>[(Zn,Mn)(1)O<sub>3</sub>F<sub>3</sub>]</b> |                         |                         |                         |                            |                          |                         |
|-----------------------------------------------|-------------------------|-------------------------|-------------------------|----------------------------|--------------------------|-------------------------|
| <b>Zn(1)/Mn(1)</b>                            | <b>O(1)<sup>v</sup></b> | <b>F(1)<sup>i</sup></b> | <b>O(2)<sup>i</sup></b> | <b>F(1)<sup>viii</sup></b> | <b>F(1)<sup>iv</sup></b> | <b>O(1)<sup>i</sup></b> |
| <b>O(1)<sup>i</sup></b>                       | 77.4(3)                 | 82.6(3)                 | 174.4(4)                | 85.8(3)                    | 84.9(3)                  | <b>2.131(5)</b>         |
| <b>F(1)<sup>iv</sup></b>                      | 158.9(4)                | 96.3(3)                 | 96.5(3)                 | 76.9(3)                    | <b>2.086(4)</b>          |                         |
| <b>F(1)<sup>viii</sup></b>                    | 90.2(3)                 | 167.1(4)                | 99.7(4)                 | <b>2.074(5)</b>            |                          |                         |
| <b>O(2)<sup>i</sup></b>                       | 102.2(4)                | 91.9(3)                 | <b>2.069(4)</b>         |                            |                          |                         |
| <b>F(1)<sup>i</sup></b>                       | 92.8(3)                 | <b>2.054(5)</b>         |                         |                            |                          |                         |
| <b>O(1)<sup>v</sup></b>                       | <b>2.044(6)</b>         |                         |                         |                            |                          |                         |

  

| <b>[Se(1)O<sub>3</sub>]</b> |                         |                           |                          |
|-----------------------------|-------------------------|---------------------------|--------------------------|
| <b>Se(1)</b>                | <b>O(1)<sup>i</sup></b> | <b>O(1)<sup>vii</sup></b> | <b>O(2)<sup>iv</sup></b> |
| <b>O(1)<sup>i</sup></b>     | 102.1(6)                | 102.1(6)                  | <b>1.730(8)</b>          |
| <b>O(1)<sup>vii</sup></b>   | 99.4(4)                 | <b>1.713(5)</b>           |                          |
| <b>O(2)<sup>iv</sup></b>    | <b>1.713(5)</b>         |                           |                          |

Symmetry codes: *i* = x, y, z; *ii* = x+1/2, -y+1/2, -z+1/2; *iii* = -x, y+1/2, -z; *iv* = -x+1/2, -y, z+1/2;  
*v* = -x, -y, -z; *vi* = -x+1/2, y+1/2, z+1/2; *vii* = x, -y+1/2, z; *viii* = x+1/2, y, -z+1/2.

**Zn<sub>1.9</sub>Mn<sub>0.1</sub>(SeO<sub>3</sub>)F<sub>2</sub> (x = 0.1) – Rietveld Refinement**

**Table S9.** Atomic coordinates and equivalent isotropic displacement parameters, B<sub>iso</sub> (Å<sup>2</sup>), for x = 0.1.

| Atoms | Wyckoff  | X           | Y           | Z          | B <sub>iso</sub> (Å <sup>2</sup> ) | F. Oc.  |
|-------|----------|-------------|-------------|------------|------------------------------------|---------|
| Zn(1) | 8d (1)   | 0.09302(16) | 0.43263(12) | 0.2508(3)  | 1.85(4)                            | 0.95000 |
| Mn(1) | 8d (1)   | 0.09302(16) | 0.43263(12) | 0.2508(3)  | 1.85(4)                            | 0.05000 |
| Se(1) | 4c (.m.) | 0.1801(2)   | 0.75000     | 0.1506(2)  | 2.01(4)                            | 0.50000 |
| F(1)  | 8d (1)   | 0.3411(6)   | 0.4536(4)   | 0.0725(8)  | 1.94(11)                           | 1.00000 |
| O(1)  | 8d (1)   | 0.0367(7)   | 0.6197(4)   | 0.0739(10) | 1.79(14)                           | 1.00000 |
| O(2)  | 4c (.m.) | 0.1705(11)  | 0.25000     | 0.3998(14) | 2.07(19)                           | 0.50000 |

**Table S10.** Bond distances (Å) and angles (°) for x = 0.1.

| [(Zn,Mn)(1)O <sub>3</sub> F <sub>3</sub> ] |                   |                   |                      |                   |                    |                   |
|--------------------------------------------|-------------------|-------------------|----------------------|-------------------|--------------------|-------------------|
| Zn(1)/Mn(1)                                | O(1) <sup>v</sup> | F(1) <sup>i</sup> | F(1) <sup>viii</sup> | O(2) <sup>i</sup> | F(1) <sup>iv</sup> | O(1) <sup>i</sup> |
| O(1) <sup>i</sup>                          | 76.7(3)           | 83.0(3)           | 86.4(3)              | 174.3(3)          | 85.2(3)            | 2.143(5)          |
| F(1) <sup>iv</sup>                         | 158.5(4)          | 96.5(3)           | 77.5(3)              | 96.5(2)           | 2.105(4)           |                   |
| O(2) <sup>i</sup>                          | 102.5(4)          | 91.4(3)           | 99.2(4)              | 2.079(4)          |                    |                   |
| F(1) <sup>viii</sup>                       | 89.6(3)           | 168.2(4)          | 2.071(5)             |                   |                    |                   |
| F(1) <sup>i</sup>                          | 92.9(3)           | 2.050(5)          |                      |                   |                    |                   |
| O(1) <sup>v</sup>                          | 2.028(5)          |                   |                      |                   |                    |                   |

| [Se(1)O <sub>3</sub> ] |                    |                   |                     |
|------------------------|--------------------|-------------------|---------------------|
| Se(1)                  | O(2) <sup>iv</sup> | O(1) <sup>i</sup> | O(1) <sup>vii</sup> |
| O(1) <sup>i</sup>      | 101.7(5)           | 99.0(4)           | 1.726(5)            |
| O(1) <sup>i</sup>      | 101.7(5)           | 1.726(5)          |                     |
| O(2) <sup>iv</sup>     | 1.715(8)           |                   |                     |

Symmetry codes: *i* = x, y, z; *ii* = x+1/2, -y+1/2, -z+1/2; *iii* = -x, y+1/2, -z; *iv* = -x+1/2, -y, z+1/2;  
*v* = -x, -y, -z; *vi* = -x+1/2, y+1/2, z+1/2; *vii* = x, -y+1/2, z; *viii* = x+1/2, y, -z+1/2.

**$Zn_{1.8}Mn_{0.2}(SeO_3)F_2$  ( $x = 0.2$ ) – Rietveld Refinement**

**Table S11.** Atomic coordinates and equivalent isotropic displacement parameters,  $B_{iso}$  ( $\text{\AA}^2$ ), for  $x = 0.2$ .

| Atoms | Wyckoff  | X           | Y           | Z          | $B_{iso}$ ( $\text{\AA}^2$ ) | F. Oc.  |
|-------|----------|-------------|-------------|------------|------------------------------|---------|
| Zn(1) | 8d (1)   | 0.09265(17) | 0.43253(13) | 0.2508(3)  | 1.69(4)                      | 0.90000 |
| Mn(1) | 8d (1)   | 0.09265(17) | 0.43253(13) | 0.2508(3)  | 1.69(4)                      | 0.10000 |
| Se(1) | 4c (.m.) | 0.1795(2)   | 0.75000     | 0.1510(3)  | 1.88(4)                      | 0.50000 |
| F(1)  | 8d (1)   | 0.3423(6)   | 0.4539(4)   | 0.0734(8)  | 1.80(12)                     | 1.00000 |
| O(1)  | 8d (1)   | 0.0368(8)   | 0.6209(5)   | 0.0742(11) | 1.90(15)                     | 1.00000 |
| O(2)  | 4c (.m.) | 0.1700(11)  | 0.25000     | 0.4004(14) | 2.09(20)                     | 0.50000 |

**Table S12.** Bond distances ( $\text{\AA}$ ) and angles ( $^\circ$ ) for  $x = 0.2$ .

| [(Zn,Mn)(1)O <sub>3</sub> F <sub>3</sub> ] |                   |                   |                      |                   |                    |                   |
|--------------------------------------------|-------------------|-------------------|----------------------|-------------------|--------------------|-------------------|
| Zn(1)/Mn(1)                                | O(1) <sup>v</sup> | F(1) <sup>i</sup> | F(1) <sup>viii</sup> | O(2) <sup>i</sup> | F(1) <sup>iv</sup> | O(1) <sup>i</sup> |
| O(1) <sup>i</sup>                          | 77.2(3)           | 83.0(3)           | 86.3(3)              | 174.4(4)          | 85.1(3)            | 2.157(5)          |
| F(1) <sup>iv</sup>                         | 158.8(4)          | 96.5(3)           | 77.2(3)              | 96.4(2)           | 2.110(4)           |                   |
| O(2) <sup>i</sup>                          | 102.3(4)          | 91.5(3)           | 99.3(4)              | 2.083(4)          |                    |                   |
| F(1) <sup>viii</sup>                       | 89.8(4)           | 168.0(4)          | 2.063(5)             |                   |                    |                   |
| F(1) <sup>i</sup>                          | 93.1(4)           | 2.062(5)          |                      |                   |                    |                   |
| O(1) <sup>v</sup>                          | 2.035(6)          |                   |                      |                   |                    |                   |

| [Se(1)O <sub>3</sub> ] |                   |                     |                    |
|------------------------|-------------------|---------------------|--------------------|
| Se(1)                  | O(1) <sup>i</sup> | O(1) <sup>vii</sup> | O(2) <sup>iv</sup> |
| O(2) <sup>iv</sup>     | 101.8(6)          | 101.8(6)            | 1.723(8)           |
| O(1) <sup>vii</sup>    | 98.7(4)           | 1.717(5)            |                    |
| O(1) <sup>i</sup>      | 1.717(5)          |                     |                    |

Symmetry codes:  $i = x, y, z$ ;  $ii = x+1/2, -y+1/2, -z+1/2$ ;  $iii = -x, y+1/2, -z$ ;  $iv = -x+1/2, -y, z+1/2$ ;  
 $v = -x, -y, -z$ ;  $vi = -x+1/2, y+1/2, z+1/2$ ;  $vii = x, -y+1/2, z$ ;  $viii = x+1/2, y, -z+1/2$ .

*Mn<sub>2</sub>(SeO<sub>3</sub>)F<sub>2</sub> (2) – Rietveld Refinement*

**Table S13.** Atomic coordinates and equivalent isotropic displacement parameters,  $B_{\text{iso}}$  ( $\text{\AA}^2$ ), for **(2)**.

| Atoms | Wyckoff  | X          | Y         | Z          | $B_{\text{iso}}$ ( $\text{\AA}^2$ ) | F. Oc.  |
|-------|----------|------------|-----------|------------|-------------------------------------|---------|
| Mn(1) | 8d (1)   | 0.0935(4)  | 0.4323(2) | 0.2519(5)  | 1.47(7)                             | 1.00000 |
| Se(1) | 4c (.m.) | 0.1759(4)  | 0.75000   | 0.1498(4)  | 1.68(7)                             | 0.50000 |
| F(1)  | 8d (1)   | 0.3458(10) | 0.4527(7) | 0.0644(11) | 1.30(17)                            | 1.00000 |
| O(1)  | 8d (1)   | 0.0348(12) | 0.6183(8) | 0.0591(16) | 2.1(3)                              | 1.00000 |
| O(2)  | 4c (.m.) | 0.1853(18) | 0.25000   | 0.405(2)   | 2.0(3)                              | 0.50000 |

**Table S14.** Bond distances ( $\text{\AA}$ ) and angles ( $^\circ$ ) for **(2)**.

| [Mn(1)O <sub>3</sub> F <sub>3</sub> ] |                   |                      |                    |                   |                   |                   |
|---------------------------------------|-------------------|----------------------|--------------------|-------------------|-------------------|-------------------|
| Mn(1)                                 | O(1) <sup>v</sup> | F(1) <sup>viii</sup> | F(1) <sup>iv</sup> | F(1) <sup>i</sup> | O(2) <sup>i</sup> | O(1) <sup>i</sup> |
| O(1) <sup>i</sup>                     | 74.5(5)           | 88.0(5)              | 86.6(5)            | 82.2(5)           | 171.5(6)          | 2.240(9)          |
| O(2) <sup>i</sup>                     | 104.5(7)          | 100.4(6)             | 96.1(4)            | 89.4(5)           | 2.177(6)          |                   |
| F(1) <sup>i</sup>                     | 92.4(6)           | 168.7(6)             | 98.0(5)            | 2.165(8)          |                   |                   |
| F(1) <sup>iv</sup>                    | 156.9(7)          | 75.6(4)              | 2.134(7)           |                   |                   |                   |
| F(1) <sup>viii</sup>                  | 90.4(5)           | 2.125(8)             |                    |                   |                   |                   |
| O(1) <sup>v</sup>                     | 2.026(9)          |                      |                    |                   |                   |                   |

  

| [Se(1)O <sub>3</sub> ] |                    |                   |                     |
|------------------------|--------------------|-------------------|---------------------|
| Se(1)                  | O(2) <sup>iv</sup> | O(1) <sup>i</sup> | O(1) <sup>vii</sup> |
| O(1) <sup>vii</sup>    | 98.3(9)            | 98.7(7)           | 1.796(9)            |
| O(1) <sup>i</sup>      | 98.3(9)            | 1.796(9)          |                     |
| O(2) <sup>iv</sup>     | 1.698(12)          |                   |                     |

Symmetry codes:  $i = x, y, z$ ;  $ii = x+1/2, -y+1/2, -z+1/2$ ;  $iii = -x, y+1/2, -z$ ;  $iv = -x+1/2, -y, z+1/2$ ;  
 $v = -x, -y, -z$ ;  $vi = -x+1/2, y+1/2, z+1/2$ ;  $vii = x, -y+1/2, z$ ;  $viii = x+1/2, y, -z+1/2$ .

***Zn<sub>2</sub>(SeO<sub>3</sub>)F<sub>2</sub> (1) and Mn<sub>2</sub>(SeO<sub>3</sub>)F<sub>2</sub> (2)***  
***Rietveld Refinement (Structural model of Co<sub>2</sub>(SeO<sub>3</sub>)F<sub>2</sub>)***

**Table S15.** Crystallographic data and structure Rietveld refinement parameters for (1) and (2) from the structural model of Co<sub>2</sub>(SeO<sub>3</sub>)F<sub>2</sub>.

| Phase                     | Zn <sub>2</sub> (SeO <sub>3</sub> )F <sub>2</sub> (1) | Mn <sub>2</sub> (SeO <sub>3</sub> )F <sub>2</sub> (2) |
|---------------------------|-------------------------------------------------------|-------------------------------------------------------|
| a, Å                      | 7.27928(5)                                            | 7.5086(11)                                            |
| b, Å                      | 10.05272(7)                                           | 10.3502(14)                                           |
| c, Å                      | 5.26967(4)                                            | 5.47702(7)                                            |
| V, Å <sup>3</sup>         | 385.617(5)                                            | 425.651(10)                                           |
| Independent Reflections   | 239                                                   | 264                                                   |
| Structural Parameters     | 18                                                    | 18                                                    |
| Profile Parameters        | 53                                                    | 46                                                    |
| Soft Distance Constraints | 0                                                     | 0                                                     |
| R <sub>Bragg</sub>        | 3.48                                                  | 13.4                                                  |
| R <sub>f</sub>            | 1.99                                                  | 8.79                                                  |
| R <sub>p</sub>            | 10.0                                                  | 21.4                                                  |
| R <sub>wp</sub>           | 12.8                                                  | 26.0                                                  |
| R <sub>exp</sub>          | 9.44                                                  | 17.14                                                 |
| χ <sup>2</sup>            | 1.84                                                  | 2.31                                                  |

**Table S16.** Atomic coordinates and equivalent isotropic displacement parameters, B<sub>iso</sub> (Å<sup>2</sup>), for (1).

| Atoms | Wyckoff  | X           | Y           | Z          | B <sub>iso</sub> (Å <sup>2</sup> ) | F. Oc.  |
|-------|----------|-------------|-------------|------------|------------------------------------|---------|
| Se(1) | 4c (.m.) | 0.68034(19) | 0.25000     | 0.1510(2)  | 1.88(4)                            | 0.50000 |
| Zn(1) | 8d (1)   | 0.59264(15) | 0.56755(11) | 0.2496(3)  | 1.84(4)                            | 1.00000 |
| F(1)  | 8d (1)   | 0.6596(6)   | 0.4545(4)   | 0.5707(7)  | 1.92(11)                           | 1.00000 |
| O(1)  | 4c (.m.) | 0.6659(10)  | 0.75000     | 0.3954(13) | 1.87(17)                           | 0.50000 |
| O(2)  | 8d (1)   | 0.5390(7)   | 0.3786(4)   | 0.0770(10) | 1.84(14)                           | 1.00000 |

**Table S17.** Bond distances (Å) and angles (°) for (1).

| [Zn(1)O <sub>3</sub> F <sub>3</sub> ] |                   |                    |                   |                   |                   |                   |
|---------------------------------------|-------------------|--------------------|-------------------|-------------------|-------------------|-------------------|
| Zn(1)                                 | O(2) <sup>v</sup> | F(1) <sup>iv</sup> | O(1) <sup>i</sup> | F(1) <sup>v</sup> | F(1) <sup>i</sup> | O(2) <sup>i</sup> |
| O(2) <sup>i</sup>                     | 78.0(3)           | 82.5(3)            | 174.7(3)          | 86.4(3)           | 84.5(3)           | <b>2.142(4)</b>   |
| F(1) <sup>i</sup>                     | 158.9(4)          | 96.2(3)            | 97.0(2)           | 77.3(3)           | <b>2.096(4)</b>   |                   |
| F(1) <sup>v</sup>                     | 89.9(3)           | 167.7(4)           | 98.9(3)           | <b>2.078(4)</b>   |                   |                   |
| O(1) <sup>i</sup>                     | 101.5(4)          | 92.3(3)            | <b>2.059(3)</b>   |                   |                   |                   |
| F(1) <sup>iv</sup>                    | 93.1(3)           | <b>2.047(4)</b>    |                   |                   |                   |                   |
| O(2) <sup>v</sup>                     | <b>2.043(5)</b>   |                    |                   |                   |                   |                   |

[Se(1)O<sub>3</sub>]

| Se(1)               | O(2) <sup>i</sup> | O(2) <sup>vii</sup> | O(1) <sup>iv</sup> |
|---------------------|-------------------|---------------------|--------------------|
| O(1) <sup>iv</sup>  | 102.2(5)          | 102.2(5)            | 1.751(7)           |
| O(2) <sup>vii</sup> | 99.2(4)           | 1.698(5)            |                    |
| O(2) <sup>i</sup>   | 1.698(5)          |                     |                    |

Symmetry codes: *i* = x, y, z; *ii* = x+1/2, -y+1/2, -z+1/2; *iii* = -x, y+1/2, -z; *iv* = -x+1/2, -y, z+1/2;  
*v* = -x, -y, -z; *vi* = -x+1/2, y+1/2, z+1/2; *vii* = x, -y+1/2, z; *viii* = x+1/2, y, -z+1/2.

**Table S18.** Atomic coordinates and equivalent isotropic displacement parameters,  $B_{iso}$  ( $\text{\AA}^2$ ), for (2).

| Atoms | Wyckoff  | X          | Y         | Z          | $B_{iso}$ ( $\text{\AA}^2$ ) | F. Oc.  |
|-------|----------|------------|-----------|------------|------------------------------|---------|
| Se(1) | 4c (.m.) | 0.6757(4)  | 0.25000   | 0.1497(4)  | 1.88(6)                      | 0.50000 |
| Mn(1) | 8d (1)   | 0.5935(4)  | 0.5677(2) | 0.2519(5)  | 1.68(6)                      | 1.00000 |
| F(1)  | 8d (1)   | 0.6543(10) | 0.4526(7) | 0.5645(11) | 1.59(18)                     | 1.00000 |
| O(1)  | 4c (.m.) | 0.6845(18) | 0.75000   | 0.406(2)   | 2.1(3)                       | 0.50000 |
| O(2)  | 8d (1)   | 0.5347(13) | 0.3816(9) | 0.0587(17) | 2.5(3)                       | 1.00000 |

**Table S19.** Bond distances ( $\text{\AA}$ ) and angles ( $^\circ$ ) for (2).

[Mn(1)O<sub>3</sub>F<sub>3</sub>]

| Mn(1)              | O(2) <sup>v</sup> | F(1) <sup>v</sup> | F(1) <sup>i</sup> | F(1) <sup>iv</sup> | O(1) <sup>i</sup> | O(2) <sup>i</sup> |
|--------------------|-------------------|-------------------|-------------------|--------------------|-------------------|-------------------|
| O(2) <sup>i</sup>  | 74.5(6)           | 88.0(5)           | 86.6(5)           | 82.2(5)            | 171.7(6)          | 2.242(10)         |
| O(1) <sup>i</sup>  | 104.5(7)          | 100.2(6)          | 96.1(4)           | 89.6(5)            | 2.177(6)          |                   |
| F(1) <sup>iv</sup> | 92.4(6)           | 168.8(6)          | 98.0(5)           | 2.164(8)           |                   |                   |
| F(1) <sup>i</sup>  | 157.0(7)          | 75.7(4)           | 2.135(7)          |                    |                   |                   |
| F(1) <sup>v</sup>  | 90.4(6)           | 2.125(8)          |                   |                    |                   |                   |
| O(2) <sup>v</sup>  | 2.024(10)         |                   |                   |                    |                   |                   |

[Se(1)O<sub>3</sub>]

| Se(1)               | O(1) <sup>iv</sup> | O(2) <sup>i</sup> | O(2) <sup>vii</sup> |
|---------------------|--------------------|-------------------|---------------------|
| O(2) <sup>vii</sup> | 98.4(9)            | 98.7(8)           | 1.796(10)           |
| O(2) <sup>i</sup>   | 98.4(9)            | 1.796(10)         |                     |
| O(1) <sup>iv</sup>  | 1.698(12)          |                   |                     |

Symmetry codes: *i* = x, y, z; *ii* = x+1/2, -y+1/2, -z+1/2; *iii* = -x, y+1/2, -z; *iv* = -x+1/2, -y, z+1/2;  
*v* = -x, -y, -z; *vi* = -x+1/2, y+1/2, z+1/2; *vii* = x, -y+1/2, z; *viii* = x+1/2, y, -z+1/2.
